# Supplementary material for: Human-Wildlife Conflicts in the Southern Yungas: What Role do Raptors Play for Local Settlers?
Source: MDPI journal article supplement (doi:10.3390/ani11051428), 2021-05-16
Supplement: s1 [file s1]

## Supplementary

Table S1: Predatory and scavenger raptors present in the Argentine Yungas

| Name                         | Species                          | Conservation status |                              | Type     | Registered by<br>our work<br>group | Recognized<br>by<br>interviewees | Target<br>group |
|------------------------------|----------------------------------|---------------------|------------------------------|----------|------------------------------------|----------------------------------|-----------------|
|                              |                                  | UICN                | Argentina                    |          |                                    |                                  |                 |
| Andean condor                | <i>Vultur gryphus</i>            | VU                  | <b>Vulnerable</b>            | Resident | x                                  | x                                | x               |
| King vulture                 | <i>Sarcoramphus papa</i>         | LC                  | Not Threatened               | Resident | x                                  | x                                |                 |
| Turkey vulture               | <i>Cathartes aura</i>            | LC                  | Not Threatened               | Resident | x                                  | x                                |                 |
| Lesser yellow-headed vulture | <i>Cathartes burrovianus</i>     | LC                  | Not Threatened               | Resident |                                    |                                  |                 |
| Black vulture                | <i>Coragyps atratus</i>          | LC                  | Not Threatened               | Resident | x                                  | x                                |                 |
| Black-chested buzzard eagle  | <i>Geranoaetus melanoleucus</i>  | LC                  | Not Threatened               | Resident | x                                  | x                                | x               |
| Black-and-white hawk-eagle   | <i>Spizastur melanoleucus</i>    | LC                  | <b>Vulnerable</b>            | Resident |                                    | x                                | x               |
| Short-tailed Hawk            | <i>Buteo brachyurus</i>          | LC                  | Not Threatened               | Resident | x                                  |                                  |                 |
| Swallow-tailed kite          | <i>Elanoides forficatus</i>      | LC                  | Not Threatened               | Migrant  | x                                  | x                                |                 |
| White-tailed kite            | <i>Elanus leucurus</i>           | LC                  | Not Threatened               | Resident | x                                  |                                  |                 |
| Pearl kite                   | <i>Gampsonyx swainsonii</i>      | LC                  | Not Threatened               | Resident |                                    |                                  |                 |
| Mississippi kite             | <i>Ictinia mississippiensis</i>  | LC                  | Not Threatened               | Migrant  |                                    |                                  |                 |
| Plumbeous kite               | <i>Ictinia plumbea</i>           | LC                  | Not Threatened               | Migrant  | x                                  |                                  |                 |
| Roadside hawk                | <i>Rupornis magnirostris</i>     | LC                  | Not Threatened               | Resident | x                                  | x                                | x               |
| Great black hawk             | <i>Buteogallus urubitinga</i>    | LC                  | Not Threatened               | Resident | x                                  | x                                | x               |
| Bay-winged hawk              | <i>Parabuteo unicinctus</i>      | LC                  | Not Threatened               | Resident |                                    |                                  |                 |
| Snail kite                   | <i>Rostrhamus sociabilis</i>     | LC                  | Not Threatened               | Resident |                                    |                                  |                 |
| Long-winged harrier          | <i>Circus buffoni</i>            | LC                  | Not Threatened               | Resident |                                    |                                  |                 |
| Cinereous harrier            | <i>Circus cinereus</i>           | LC                  | Not Threatened               | Resident | x                                  |                                  |                 |
| Bicolored hawk               | <i>Accipiter bicolor</i>         | LC                  | Not Threatened               | Resident | x                                  | x                                |                 |
| Sharp-shinned hawk           | <i>Accipiter striatus</i>        | LC                  | Not Threatened               | Resident | x                                  |                                  |                 |
| White-rumped hawk            | <i>Buteo leucorrhous</i>         | LC                  | <b>Endangered</b>            | Resident | x                                  | x                                |                 |
| Zone-tailed hawk             | <i>Buteo Albonotatus</i>         | LC                  | Not Threatened               | Resident |                                    |                                  |                 |
| Hook-billed kite             | <i>Chondrohierax uncinatus</i>   | LC                  | Not Threatened               | Migrant  | x                                  |                                  |                 |
| Gray hawk                    | <i>Asturina nitida</i>           | LC                  | <b>Vulnerable</b>            | Resident |                                    |                                  |                 |
| Rufous-thighed kite          | <i>Harpagus diodon</i>           | LC                  | Not Threatened               | Resident |                                    |                                  |                 |
| White-tailed hawk            | <i>Geranoaetus albicaudatus</i>  | LC                  | Not Threatened               | Resident | x                                  |                                  |                 |
| Swainson's hawk              | <i>Buteo swainsoni</i>           | LC                  | <b>Vulnerable</b>            | Migrant  |                                    |                                  |                 |
| Red-backed hawk              | <i>Geranoaetus polyosoma</i>     | LC                  | Not Threatened               | Resident | x                                  | x                                | x               |
| Crane hawk                   | <i>Geranospiza caerulescens</i>  | LC                  | Not Threatened               | Resident | x                                  |                                  |                 |
| Solitary eagle               | <i>Harpyhaliaetus solitarius</i> | NT                  | <b>Endangered</b>            | Resident | x                                  | x                                |                 |
| American harpy eagle         | <i>Harpia harpyja</i>            | NT                  | <b>Critically endangered</b> | Resident |                                    | x                                | x               |
| Ornate hawk-eagle            | <i>Spizaetus ornatus</i>         | NT                  | <b>Endangered</b>            | Resident |                                    | x                                | x               |
| Black-collared hawk          | <i>Busarellus nigricollis</i>    | LC                  | Not Threatened               | Resident |                                    |                                  |                 |
| Savanna hawk                 | <i>Buteogallus meridionalis</i>  | LC                  | Not Threatened               | Resident | x                                  | x                                |                 |
| Crowned eagle                | <i>Buteogallus coronatus</i>     | EN                  | <b>Endangered</b>            | Resident |                                    | x                                | x               |

Table S1: Continued.

| Name                    | Species                           | Conservation status |                   | Type     | Registered by<br>our work<br>group | Recognized<br>by<br>interviewees | Target<br>group |
|-------------------------|-----------------------------------|---------------------|-------------------|----------|------------------------------------|----------------------------------|-----------------|
|                         |                                   | IUCN                | Argentina         |          |                                    |                                  |                 |
| Black-and-chesnut eagle | <i>Spizaetus isidori</i>          | NT                  | <b>Endangered</b> | Resident | x                                  | x                                | x               |
| Southern caracara       | <i>Caracara plancus</i>           | LC                  | Not Threatened    | Resident | x                                  | x                                | x               |
| Chimango caracara       | <i>Phalcoboenus chimango</i>      | LC                  | Not Threatened    | Resident | x                                  |                                  |                 |
| Collared forest-falcon  | <i>Micrastur semitorquatus</i>    | LC                  | <b>Vulnerable</b> | Resident |                                    | x                                |                 |
| Barred forest-falcon    | <i>Micrastur ruficollis</i>       | LC                  | Not Threatened    | Resident | x                                  |                                  |                 |
| Spot-winged falconet    | <i>Spiziapteryx circumcinctus</i> | LC                  | <b>Vulnerable</b> | Resident |                                    |                                  |                 |
| Peregrine falcon        | <i>Falco peregrinus</i>           | LC                  | Not Threatened    | Resident | x                                  | x                                |                 |
| Aplomado falcon         | <i>Falco femoralis</i>            | LC                  | Not Threatened    | Resident | x                                  |                                  |                 |
| Orange-breasted falcon  | <i>Falco deiroleucus</i>          | NT                  | <b>Endangered</b> | Resident | x                                  | x                                |                 |
| Bat falcon              | <i>Falco rufigularis</i>          | LC                  | Not Threatened    | Resident | x                                  |                                  |                 |
| American kestrel        | <i>Falco sparverius</i>           | LC                  | Not Threatened    | Resident | x                                  |                                  |                 |

# HUMAN-RAPTORS INTERACTION SURVEY

---

Questions and themes included in this survey are a guide of the topics and information that should be addressed by the interviewer. Surveys adjusted to the interviews development, therefore questions were not addressed in the same way or the same order on each interview.

---

## Personal information of interviewees

Interviewee Name: \_\_\_\_\_  
Age: \_\_\_\_\_  
Gender: \_\_\_\_\_  
Ethnic affiliation: \_\_\_\_\_  
Place of origin (place where it was born and/or raised): \_\_\_\_\_  
How long has it been since you settle in the area?  
Settlement type: \_\_\_\_\_  
Sites where you have lived: \_\_\_\_\_  
Activities/occupations/Actual or past expertise:  
Are you or have you been involved in livestock rearing? Which species? Which husbandry practice do you apply?

Are you or have you been involved in poultry rearing? Which husbandry practice do you apply?  
Field visits (With what purpose? Do you go alone, with a partner or in group? How long does each visit last? Where do you go? Why?)  
Hunting history: \_\_\_\_\_  
Description of the area (have there been changes in the area since you lived here? What was it like before?)  
Other biographic information.

---

## Knowledge, perceptions and attitudes towards raptors

Description of the raptors known.  
Morphological and behavioral knowledge of raptors known.  
Raptors identification in the visual supplementary material.  
How are they call?  
What do raptors eat? Prey's list.  
Perceptions and attitudes towards raptors.

---

## Human-wildlife Conflict

Do you have conflicts with a particular animal? Why? Are they harmful for crops? Are they harmful for domestic animals?  
Conflicts with raptors.  
List the animals that prey on livestock (cattle, sheeps, goats, pigs and horses).  
List the animals that prey on poultry.  
How do you know which is the conflictive animal? Does it leave marks and/or footprints? Does it have a particular behavior? Have you seen it? Has someone told you about it?  
What is the importance of domestic animals lost?  
Response towards conflict. Do you take prevention measurements? What actions do you take to stop or prevent the conflict?  
Persecution of conflictive species.
